# Supplementary material
Source: Springer Nature journal article supplement (https://www.springermedizin.de/resource/supplementary/12889_2012_4537_MOESM1_ESM.pdf/9493460)
Supplement: MOESM1 [file 9493460]

## Questionnaire survey and record

Id: □□□□□

Province \_\_\_\_\_  
County \_\_\_\_\_  
Name \_\_\_\_\_  
Address \_\_\_\_\_  
Phone number \_\_\_\_\_

### Excluded form

- (a) How old are you? \_\_\_\_\_ (If age <20 or >60, then excluded)
- (b) Do you have some reproductive dysfunctions or diseases (genital diseases such as cryptorchidism, inguinal hernia, varicocele, epididymitis, gonorrhoea, chlamydia, and surgery for torsion of the testis) ?
1. Yes (**excluded**)    2. No
- (c) Do you have some chronic disease, such as diabetes, kidney disease, atherosclerosis, vascular disease, genital diseases, or hypertension?
1. Yes (**excluded**)    2. No
- (d) Do you work in factory related to Mn machining?
1. Yes (**excluded**)    2. No
- (e) Do you work in or live near factories related to metal machining, such as lead, cadmium, zinc, copper, etc.?
1. Yes (**excluded**)    2. No

**A. Demography characteristics**

for coding

- A1 Birth date: \_\_\_\_\_
- A2 Height : \_\_\_\_\_cm
- A3 Weight : \_\_\_\_\_kg
- A4 Education level:
1. Illiteracy 2. Primary school 3. Junior high school
4. Senior high school 5. junior college or higher
- A5 Registered residence: 1. Urban 2. Rural
- A6 Occupation:
1. Peasant 2. Factory worker 3. Commercial service worker
4. Doctor/teacher/researcher 5. Other \_\_\_\_\_
- A7 Do you have sexual intercourse? 1. Yes 2. No (**skip to A9**)
- A8 Age of first sexual intercourse? \_\_\_\_\_ year old
- A9 Marriage status:
1. Unmarried (**skip to A11**) 2. Married
- A10 Age of married: \_\_\_\_\_
- A11 Do you have child? 1. Yes 2. No
- A12 Income: \_\_\_\_\_ Yuan /person/year

**B. Living status**

- B1 Birth place: 1. Urban 2. Rural
- B2 How long do you live here? \_\_\_\_\_ year
- B3 Did you ever have enuresis? 1. Yes 2. No
- B4 Did you ever have mumps? 1. Yes 2. No
- B5 Do you smoke? 1. Yes 2. No (**skip to B7**)
- B6 Mean number of units smoked per day? \_\_\_\_\_
- B7 Do you drink alcohol? 1. Yes 2. No (**skip to B10**)
- B8 What kind of alcohol? 1. Beer 2. White wine 3. Red wine
4. Other \_\_\_\_\_
- B9 Mean number of alcohol per day? \_\_\_\_\_

- B10 Do you drink coffee? 1. Yes 2. No
- B11 Do you drink tea? 1. Yes 2. No
- B12 Do you work at sitting position long time? 1. Yes 2. No
- B13 Do you contact with pesticide often? 1. Yes 2. No
- B14 Do you contact with chemical materials, such as benzene, nitrogen sulfide, often?  
1. Yes 2. No
- B15 Do you use mobile phone every day?  
1. Yes 2. No (**skip to B17**)
- B16 Where the mobile phone is carried?  
1. Trouser pocket 2. Bag 3. Other place
- B17 Do you use computer often? 1. Yes 2. No (**finished**)
- B18 How long do you use computer per every day? \_\_\_\_\_hours

**Signature of interviewer:**\_\_\_\_\_

**Data of examination:**\_\_\_\_\_

### Records of semen quality examination

- C1. Data for first semen sample collection: \_\_\_\_\_
- C2. Abstinence interval (day): \_\_\_\_\_
- C3. Examination time after ejaculation (minute): \_\_\_\_\_
- C4. Appearance: 1.Normal 2. Abnormal
- C5. Time for liquefaction (minute):
1.  $\leq 20$  2. 21~30 3. 31~60 4.  $>60$
- C6. Stickiness (length of drawbench): 1.  $\leq 2\text{cm}$  2.  $>2\text{cm}$
- C7. Agglutination: 1.No 2. Have
- C8. Volume (ml): \_\_\_\_\_
- C9. pH: \_\_\_\_\_
- C10. Motility (100 sperm)
- (a) rapid and linear progressive motility \_\_\_\_\_
- (b) sluggish linear motility \_\_\_\_\_
- (c) no linear \_\_\_\_\_
- (d) no motile \_\_\_\_\_
- C11. Density ( $\times 10^6/\text{ml}$ ) \_\_\_\_\_
- C12. Total sperm count ( $\times 10^6$ ) \_\_\_\_\_
- C13. Sperm viability (%) \_\_\_\_\_
- C14. Normal sperm forms (%) \_\_\_\_\_

Signature of examination person: \_\_\_\_\_

Data of examination: \_\_\_\_\_
